# Supplementary material for: Saving electric energy by integrating a photoelectrode into a Li-ion battery
Source: Royal Society of Chemistry journal article supplement (doi:10.1039/c5ta06908d), 2015-01-01
Supplement: c5ta06908d1.pdf [file c5ta06908d1.pdf]

Supporting Information for

## Saving electric energy by integrating a photoelectrode into a Li-ion battery

Qi Li,<sup>a,b</sup> Na Li,<sup>a,\*</sup> Masayoshi Ishida<sup>b</sup> and Haoshen Zhou<sup>a,b,c,\*</sup>

<sup>a</sup>Energy Technology Research Institute, National Institute of Advanced Industrial Science and Technology (AIST), Umezono 1-1-1, Tsukuba, 305-8568, Japan. Correspondence and requests for materials should be addressed to H.Z. (email:hs.zhou@aist.go.jp or nli.ri@aist.go.jp).

<sup>b</sup>Graduate School of System and Information Engineering, University of Tsukuba Tennoudai 1-1-1, Tsukuba, 305-8573, Japan

<sup>c</sup>National Laboratory of Solid State Microstructures & Department of Energy Science and Engineering, Nanjing University, Nanjing 210093, China.

### Experimental Section

Preparation of the photoassisted chargeable LIB: The photoassisted chargeable LIB consists of a metallic Li anode with organic electrolyte, a LATP glass ceramic separator, a LiFePO<sub>4</sub> cathode with aqueous electrolyte, and a TiO<sub>2</sub> photoelectrode. The preparation of the anode side was conducted in an Ar-filled glove box (<1 p.p.m. of H<sub>2</sub>O and O<sub>2</sub>). The lithium foil with a thickness of 0.2 mm was cut to a rectangle of 8×40 mm, and then pressed onto a Cu mesh (Nilaco Cor., 100 mesh). An organic

electrolyte of 1 M LiClO<sub>4</sub> in ethylene carbonate (EC)/dimethyl carbonate (DMC) with a volume ratio 1:1 was added into this glass cylinder. LATP glass ceramic separator was supplied by Ohara Inc., Japan. The thickness and the electrical conductivity of the LATP plate at 25 °C was *ca.* 150 μm and 1.05×10<sup>-4</sup> S cm<sup>-1</sup>. The LATP was fixed on top of the glass cylinder thus sealing in the anode. The cathode (LiFePO<sub>4</sub>) and photoelectrode (TiO<sub>2</sub>) were stuck on the other cylindrical shape of the quartz shell. An aqueous electrolyte of 1 M Li<sub>2</sub>SO<sub>4</sub> and 0.1 M LiI was added into this quartz cylinder. The LiFePO<sub>4</sub> cathode was prepared by mixing the LiFePO<sub>4</sub> with Super P carbon and polytetrafluoroethylene (PTFE) in a weight ratio of 8:1:1. The resulting slurry was then cast on a Ti mesh to achieve a loading of 0.5 mg cm<sup>-2</sup>. For the photoelectrode, the nanorod TiO<sub>2</sub> was deposited on Ti mesh by a modified hydrothermal and thermal treatment.<sup>[1]</sup> In a typical procedure, the Ti mesh treated in air at 500 °C for 10 min was placed in an aqueous solution (28 ml) of 450 μl TiCl<sub>4</sub> (99.0%, Sigma-Aldrich) and 1.4 ml HCl (37%, Wako) and hydrothermally heated at 170 °C for 10 h. After reaction, the TiO<sub>2</sub> nanorod-decorated Ti gauze was washed with water, sintered at 450 °C for 2 h. The preparation and assembly of simple Li-ion battery was similar with above of solar Li-ion battery. The differences were that the photoelectrode was removed and the electrolyte is the 1 M Li<sub>2</sub>SO<sub>4</sub> aqueous without LiI.

Electrochemical and photoelectrochemical measurements: The photoassisted chargeable LIB were tested using a Hokuto charging/ discharging machine, within a voltage range between 3.1 and 3.7 V, with discharge/charge current densities varying from 0.01-0.04 mA cm<sup>-2</sup>. A XEF-501S Xe-lamp (San-ei Electric Co., Japan) was used

as the light source. CV was tested using a Solartron instruments.

Characterizations: XRD was performed using a Bruker D8 Advanced diffractometer with Cu K $\alpha$  ( $\lambda = 1.5406 \text{ \AA}$ ) radiation. The UV-visible absorption spectra measurement was performed using Shimadzu UV3101PC. SEM observation was performed on a Hitachi S4800.

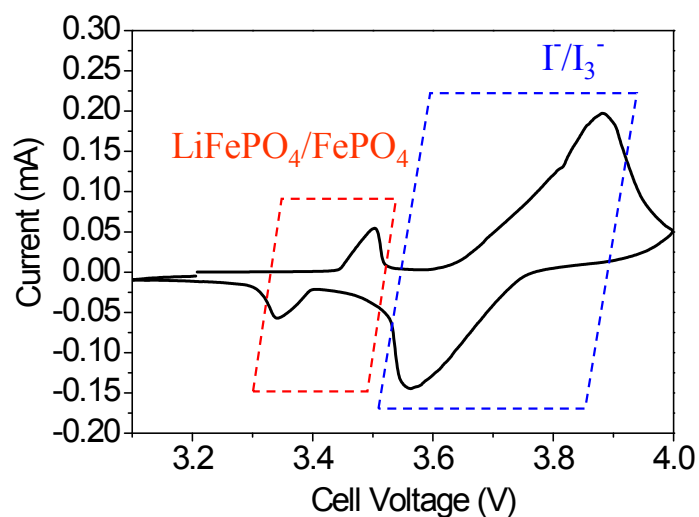

**Supplementary Figure S1** CV curve of Li-ion battery with the 1 M  $\text{Li}_2\text{SO}_4$  and 0.01 M LiI as electrolyte at a scan rate of  $0.01 \text{ mV s}^{-1}$ .

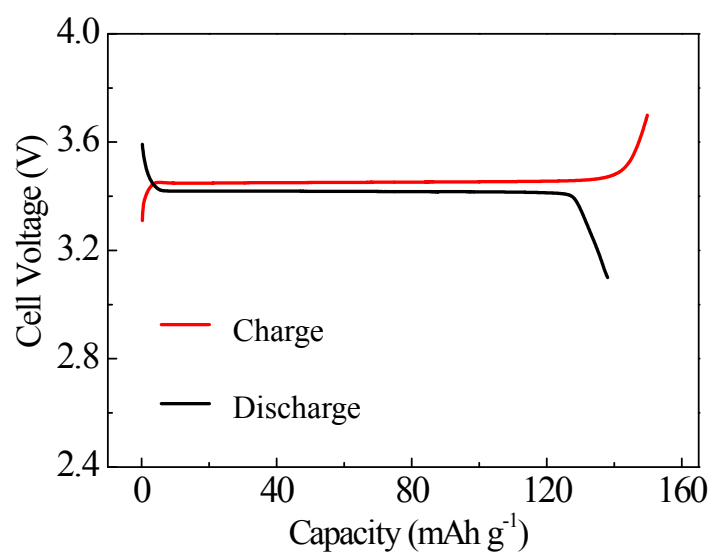

**Supplementary Figure S2** The charge/discharge curve of a simple Li-LiFePO<sub>4</sub> battery at a current density of 0.01 mA cm<sup>-2</sup>.

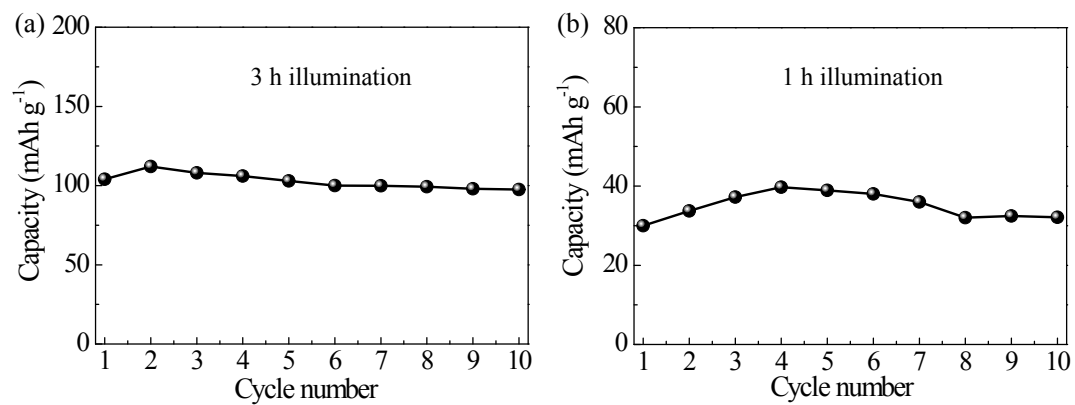

**Supplementary Figure S3** The cycling performances of the photoassisted chargeable LIB under the illumination for 3h (a) and 1h (b).

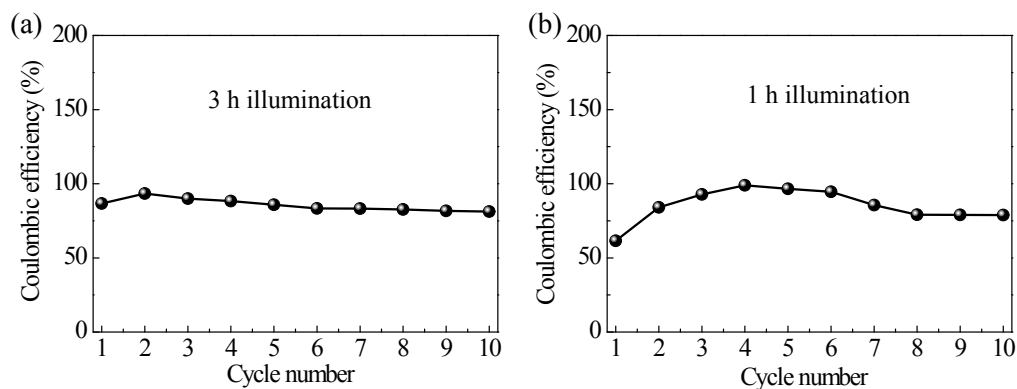

**Supplementary Figure S4** The Coulombic efficiencies of the photoassisted chargeable LIB under the illumination for 3 h (a) and 1 h (b).

In this work, upon charging, Li anode and the TiO<sub>2</sub> photoelectrode are connected to the outside circuit, while upon discharging, Li anode and LiFePO<sub>4</sub> electrode are connected to the outside circuit as shown in Fig. 1a. Therefore, different from conventional two-electrode system, the proposed Coulombic efficiency was calculated using the equation

$$CE = \frac{I_{\text{photoelectrode}} \cdot t_c}{I_{\text{LiFePO}_4} \cdot t_d} \times 100$$

Where CE is the Coulombic efficiency (%),  $I_{\text{photoelectrode}}$  (mA) is the charging current on TiO<sub>2</sub> photoelectrode and  $I_{\text{LiFePO}_4}$  (mA) is the discharging current on LiFePO<sub>4</sub> electrode.  $t_c$  and  $t_d$  (h) is the charge and discharge time, respectively.

1. A. Kumar, A. R. Madaria and C. W. Zhou, *J. Phys. Chem. C* 2010, **114**, 7787.
